# Supplementary material
Source: PubMed Central journal article supplement (PMC4766734)
Supplement: NIHMS65311-supplement-Supplemental_Information.pdf [file NIHMS65311-supplement-Supplemental_Information.pdf]

## Supplemental Information

### An Smc3 Acetylation Cycle Is Essential for Establishment of Sister Chromatid Cohesion

Frederic Beckouët, Bin Hu, Maurici B. Roig, Takashi Sutani, Makiko Komata, Pelin Uluocak, Vittorio L. Katis, Katsuhiko Shirahige, and Kim Nasmyth

Figure S1

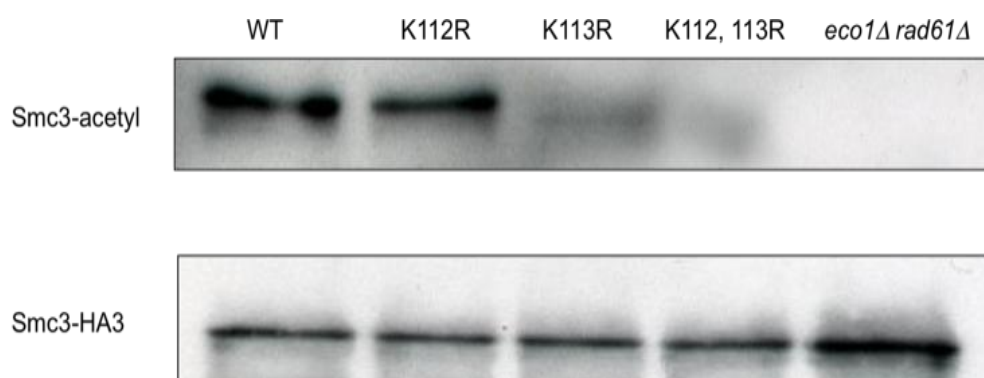

**Figure S1. Specificity of a mouse antibody raised against the acetylated lysines K112 and K133 of Smc3.** EU3444 (*SMC3: URA3: SMC3-3HA*), EU3445 (*SMC3: URA3: smc3 (K112R)-3HA*), EU3446 (*SMC3: URA3: smc3 (K113R)-3HA*), EU3447 (*SMC3: URA3: smc3 (K112R, K113R)-3HA*) and 15794 (*Δsmc3::HIS3, leu2::SMC3-HA3::LEU2 eco1Δ rad61Δ*) were grown in YPD. Cell extracts were prepared, and wild type and mutant Smc3-HA was immunopurified under denaturing conditions. The acetylation status of Smc3 was analyzed by Western blot using a mouse antibody raised against the acetylated lysines K112 and K133 of Smc3. Equal recovery of Smc3 in the immunoprecipitates was confirmed by probing the membrane with an antibody raised against the HA epitope tag fused to Smc3.

**Figure S2**

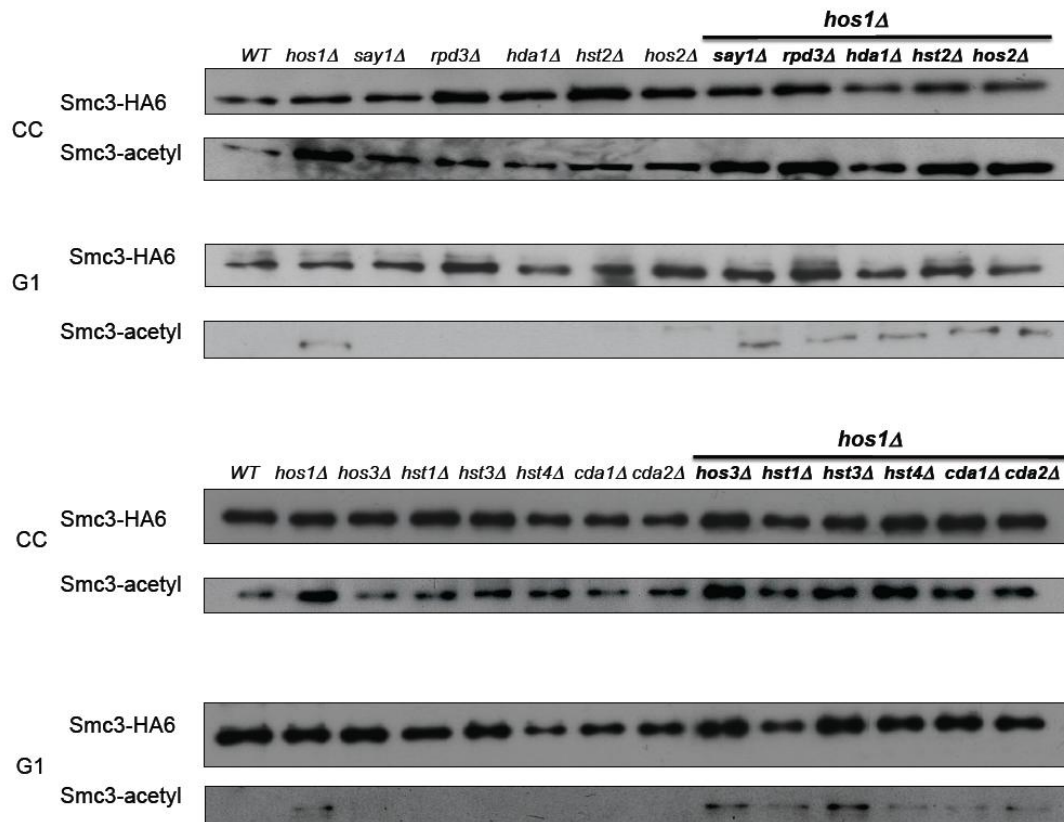

**Figure S2. Hos1 is the main deacetylase that deacetylates Smc3.** In order to check if other deacetylases contribute to Smc3 deacetylation, eleven deacetylase genes have been individually inactivated in *hos1Δ* cells. Double and single mutants were grown in YPD and arrested in G1 by  $\alpha$  factor. Proteins from these strains were extracted and the level of Smc3 acetylation monitored by Western blot of crude extracts using  $\alpha$ -Smc3 acetylated antibodies.

## Table S1. Strains Used

|        |                                                                                                                                                                |
|--------|----------------------------------------------------------------------------------------------------------------------------------------------------------------|
| K7040  | <i>MATa, ade2-101, CFIII (CEN3. L.YPH278) TRP1, SUP11</i>                                                                                                      |
| K8965  | <i>MATa esp1-1, pGAL1-10-ESP1::TRP1</i>                                                                                                                        |
| K8967  | <i>MATa esp1-1, pGAL1-10-esp1-C1531A::TRP1</i>                                                                                                                 |
| K15544 | <i>MATa <math>\Delta</math>smc3::HIS3, leu2::SMC3-HA3::LEU2</i>                                                                                                |
| K16351 | <i>MATa <math>\Delta</math>smc3::HIS3, leu2::SMC3-HA3::LEU2, <math>\Delta</math>hos1::KanMX4</i>                                                               |
| K16353 | <i>MATa UBR1::GAL1,10p-Glu-UBR1/CMVp-tTA(HIS3),LEU2::pCM244, ECO1::kanMX-tetO2p-DHFRts-HA3-ECO1,Smc3-PK6::KanMx4::URA3</i>                                     |
| K16354 | <i>MATa UBR1::GAL1,10p-Glu-UBR1/CMVp-tTA(HIS3),LEU2::pCM244</i>                                                                                                |
| K16394 | <i>MATalpha TRP1::P<sup>MET3</sup>CDC20, SCC1-HA6::HIS3, SMC3-PK6::KanMx6, YEplac112-PGALITEV</i>                                                              |
| K16397 | <i>MATa TRP1::P<sup>MET3</sup>CDC20, SCC1(TEV220)-HA6::HIS3, SMC3-PK6::KanMx6</i>                                                                              |
| K16465 | <i>MAT<math>\alpha</math> TRP1::P<sup>MET3</sup>CDC20, SCC1(TEV220)-HA6::HIS3, SMC3-PK6::KanMx6, <math>\Delta</math>hos1::KanMx4::ADE2, YEplac112-PGALITEV</i> |
| K16466 | <i>MATa, ade2-101, <math>\Delta</math>hos1::KanMx4, CFIII (CEN3. L.YPH278) TRP1, SUP11</i>                                                                     |
| K16470 | <i>MATa ura3::3XURA3 tetO2X112, his3::HIS3tetR-GFP, <math>\Delta</math>hos1::kanMx4, TRP1::P<sup>MET3</sup>CDC20</i>                                           |
| K16472 | <i>MATa ura3::3XURA3 tetO2X112, his3::HIS3tetR-GFP, TRP1::P<sup>MET3</sup>CDC20</i>                                                                            |
| K16546 | <i>MATa, SCC1-MYC18::TRP1, SMC3-PK6::KanMX4, pGAL1-10-SCC1(R<sub>180</sub>D, R<sub>268</sub>D)-HA3::LEU2</i>                                                   |
| K16548 | <i>MATa, SMC3-PK6, pGAL1-10-SCC1-HA3::LEU2</i>                                                                                                                 |
| K16653 | <i>MATa SMC3-HA6::HIS3, dbf4::TRP1::SWI5p-DBF4</i>                                                                                                             |
| K16655 | <i>MATa SMC3-HA6::HIS3</i>                                                                                                                                     |
| K16842 | <i>MATa SMC3-HA6::HIS3, <math>\Delta</math>ctf8::NaTMX</i>                                                                                                     |
| K16845 | <i>MATa SMC3-HA6::HIS3, <math>\Delta</math>ctf4::NaTMX</i>                                                                                                     |
| K17304 | <i>MATa SCC1-HA6::HIS3, SMC3-MYC18::URA3, <math>\Delta</math>hos1::KanMx4</i>                                                                                  |
| K17305 | <i>MAT<math>\alpha</math> esp1-1, <math>\Delta</math>hos1::KanMx4, pGAL1-10-ESP1::TRP1</i>                                                                     |
| K17506 | <i>MATa tetO2X224::URA3 (17.8 kb frm CEN5), leu2::tetR-GFP::LEU2, <math>\Delta</math>hos1::kanMx4::ADE2, TRP1::P<sup>MET3</sup>CDC20</i>                       |
| K17508 | <i>MATa tetO2X224::URA3 (17.8 kb frm CEN5), leu2::tetR-GFP::LEU2, TRP1::P<sup>MET3</sup>CDC20</i>                                                              |
| K17510 | <i>MATa tetO2X224::URA3 (12.6 kb frm CEN5), leu2::tetR-GFP::LEU2, hos1<math>\Delta</math>::kanMx4::ADE2, TRP1::P<sup>MET3</sup>CDC20</i>                       |
| K17512 | <i>MATa tetO2X224::URA3 (12.6 kb frm CEN5), leu2::tetR-GFP::LEU2, TRP1::P<sup>MET3</sup>CDC20</i>                                                              |

K17515 *MATa UBR1::GAL1,10p-Glu-UBR1/CMVp-tTA(HIS3),LEU2::pCM244, Smc3-PK6::KanMx4::URA3, his3::GFP-LacI::HIS3, trp1::256lacO::TRP1, NatMx::P<sup>MET3</sup> CDC20*

K17516 *MATa UBR1::GAL1,10p-Glu-UBR1/CMVp-tTA(HIS3),LEU2::pCM244, Smc3-PK6::KanMx4::URA3, his3::GFP-LacI::HIS3, trp1::256lacO::TRP1,  $\Delta$ hos1::KanMx4::ADE2, NatMx::P<sup>MET3</sup> CDC20*

K17376 *MATa UBR1::GAL1,10p-Glu-UBR1/CMVp-tTA(HIS3),LEU2::pCM244, Smc3-PK6::KanMx4::URA3, ECO1::kanMX-tetO2p-DHFRts-HA3-ECO1, his3::GFP-LacI::HIS3, trp1::256lacO::TRP1, NatMx::P<sup>MET3</sup> CDC20*

K17382 *MATa UBR1::GAL1,10p-Glu-UBR1/CMVp-tTA(HIS3),LEU2::pCM244, Smc3-PK6::KanMx4::URA3, ECO1::kanMX-tetO2p-DHFRts-HA3-ECO1, his3::GFP-LacI::HIS3, trp1::256lacO::TRP1,  $\Delta$ hos1::KanMx4::ADE2, NatMx::P<sup>MET3</sup> CDC20*

K17383 *MATa ura3::3XURA3 tetO2X112, his3::tetR-GFP::HIS3, TRP1::P<sup>MET3</sup> CDC20, YEplac181-PGALIHOS1*

K17384 *MATa ura3::3XURA3 tetO2X112, his3::tetR-GFP::HIS3, TRP1::P<sup>MET3</sup> CDC20, YEplac181*

K17513 *MATa trp1::256LacO::TRP1, his3::LACI-GFP::HIS3, TRP1::P<sup>MET3</sup> CDC20, SMC3-PK6::KanMx4, YEplac195-PGALIHOS1*

K17514 *MATa trp1::256LacO::TRP1, his3::LACI-GFP::HIS3, TRP1::P<sup>MET3</sup> CDC20, SMC3-PK6::KanMx4, YEplac195*

K17957 *MATa SMC3-PK6::KanMx4, TRP1::P<sup>MET3</sup> CDC20, pGAL1-10-SCC1(R<sub>180D</sub>, R<sub>268D</sub>)-HA3::LEU2, his3::tetR-GFP::HIS3, YEplac195*

K17955 *MATa SMC3-PK6::KanMx4, TRP1::P<sup>MET3</sup> CDC20, pGAL1-10-SCC1(R<sub>180D</sub>, R<sub>268D</sub>)-HA3::LEU2, his3::tetR-GFP::HIS3, YEplac195-Gal-Eco1*

K17987 *MAT $\alpha$  trp1::256LacO::TRP1, his3::LACI-GFP::HIS3, NatMx4::P<sup>MET3</sup> CDC20,  $\Delta$ hos1::KanMx4::ADE2, YEplac195-SMC1/SMC3*

K17988 *MAT $\alpha$  trp1::256LacO::TRP1, his3::LACI-GFP::HIS3, NatMx4::P<sup>MET3</sup> CDC20,  $\Delta$ hos1::KanMx4::ADE2, YEplac195*

K17989 *MATa trp1::256LacO::TRP1, his3::LACI-GFP::HIS3, NatMx4::P<sup>MET3</sup> CDC20, YEplac195-SMC1/SMC3*

K17990 *MATa trp1::256LacO::TRP1, his3::LACI-GFP::HIS3, NatMx4::P<sup>MET3</sup> CDC20, YEplac195*

K17966 *MATa SMC3-HA6::HIS3,  $\Delta$ hos1::KanMx4*

K17996 *MATa SMC3-HA6::HIS3,  $\Delta$ hos2::KanMx4*

K17997 *MATa SMC3-HA6::HIS3,  $\Delta$ hos3::KanMx4*

K17998 *MATa SMC3-HA6::HIS3,  $\Delta$ hst1::KanMx4*

K17999 *MATa SMC3-HA6::HIS3,  $\Delta$ hst2::KanMx4*

K18000 *MATa SMC3-HA6::HIS3,  $\Delta$ hst3::KanMx4*

K18001 *MATa SMC3-HA6::HIS3, Δhst4::KanMx4*

K18002 *MATa SMC3-HA6::HIS3, Δsay1::KanMx4*

K18003 *MATa SMC3-HA6::HIS3, Δrpd3::KanMx4*

K18004 *MATa SMC3-HA6::HIS3, Δhda1::KanMx4*

K18005 *MATa SMC3-HA6::HIS3, Δcda1::KanMx4*

K18006 *MATa SMC3-HA6::HIS3, Δhos2::KanMx4, Δhos1::KanMx4::ADE2*

K18007 *MATa SMC3-HA6::HIS3, Δhst2::KanMx4, Δhos1::KanMx4::ADE*

K18008 *MATa SMC3-HA6::HIS3, Δhst3::KanMx4, Δhos1::KanMx4::ADE2*

K18009 *MATa SMC3-HA6::HIS3, Δhst4::KanMx4, Δhos1::KanMx4::ADE2*

K18010 *MATa SMC3-HA6::HIS3, Δhst1::KanMx4, Δhos1::KanMx4::ADE2*

K18011 *MATa SMC3-HA6::HIS3, Δhda1::KanMx4, Δhos1::KanMx4::ADE2*

K18012 *MATa SMC3-HA6::HIS3, Δhos3::KanMx4, Δhos1::KanMx4::ADE2*

K18013 *MATa SMC3-HA6::HIS3, Δsay1::KanMx4, Δhos1::KanMx4::ADE2*

K18014 *MATa SMC3-HA6::HIS3, Δrpd3::KanMx4, Δhos1::KanMx4::ADE2*

K18015 *MATa SMC3-HA6::HIS3, Δcda1::KanMx4, Δhos1::KanMx4::ADE2*

K18016 *MATa SMC3-HA6::HIS3, Δcda2::KanMx4, Δhos1::KanMx4::ADE2*

K18017 *MATa SMC3-HA6::HIS3, Δcda2::KanMx4*

K18018 *MATa SMC3-HA6::HIS3, Δsir2::KanMx4*
